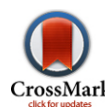

# Risk Factors for Acute Stroke among South Asians Compared to Other Racial/Ethnic Groups

Tefera Gezmu<sup>1\*</sup>, Dona Schneider<sup>1</sup>, Kitaw Demissie<sup>2</sup>, Yong Lin<sup>2</sup>, Martin S. Gizzi<sup>3</sup>

**1** Edward J. Bloustein School of Planning and Public Policy, Rutgers the State University of New Jersey, New Brunswick, New Jersey, United States of America, **2** Rutgers-School of Public Health, Department of Epidemiology, Piscataway, New Jersey, United States of America, **3** The New Jersey Neuroscience Institute at the John F. Kennedy Medical Center and Seton Hall University, Edison, New Jersey, United States of America

## Abstract

**Background:** Studies of racial/ethnic variations in stroke rarely consider the South Asian population, one of the fastest growing sub-groups in the United States. This study compared risk factors for stroke among South Asians with those for whites, African-Americans, and Hispanics.

**Methods:** Data on 3290 stroke patients were analyzed to examine risk differences among the four racial/ethnic groups. Data on 3290 patients admitted to a regional stroke center were analyzed to examine risk differences for ischemic stroke (including subtypes of small and large vessel disease) among South Asians, whites, African Americans and Hispanics.

**Results:** South Asians were younger and had higher rates of diabetes mellitus, blood pressure, and fasting blood glucose levels than other race/ethnicities. Prevalence of diabetic and antiplatelet medication use, as well as the incidence of small-artery occlusion ischemic stroke was also higher among South Asians. South Asians were almost a decade younger and had comparable socioeconomic levels as whites; however, their stroke risk factors were comparable to that of African Americans and Hispanics.

**Discussion:** Observed differences in stroke may be explained by dietary and life style choices of South Asian-Americans, risk factors that are potentially modifiable. Future population and epidemiologic studies should consider growing ethnic minority groups in the examination of the nature, outcome, and medical care profiles of stroke.

**Citation:** Gezmu T, Schneider D, Demissie K, Lin Y, Gizzi MS (2014) Risk Factors for Acute Stroke among South Asians Compared to Other Racial/Ethnic Groups. PLoS ONE 9(9): e108901. doi:10.1371/journal.pone.0108901

**Editor:** Jens Minnerup, University of Münster, Germany

**Received:** May 12, 2014; **Accepted:** August 28, 2014; **Published:** September 30, 2014

**Copyright:** © 2014 Gezmu et al. This is an open-access article distributed under the terms of the Creative Commons Attribution License, which permits unrestricted use, distribution, and reproduction in any medium, provided the original author and source are credited.

**Data Availability:** The authors confirm that, for approved reasons, some access restrictions apply to the data underlying the findings. Data for this study was based on a hospital medical records. The data used for this study includes Public Health Information; legal and ethical restriction limits us from including it in the manuscript, as a supplemental file or making it publically accessible. Readers who are interested in examining the data should contact either Dr. Tefera Gezmu at gezmu@rutgers.edu (Phone 848-932-2756) or Dr. Martin S. Gizzi at mgizzi@jfkhealth.org (Phone 201-207-7526).

**Funding:** The authors have no support or funding to report.

**Competing Interests:** The authors have declared that no competing interests exist.

\* Email: gezmu@rutgers.edu

## Introduction

The incidence and death rate from stroke have declined in the United States [1–2], while racial/ethnic, socioeconomic, and gender disparities remain. The literature abounds with studies on racial/ethnic disparities in stroke mortality and behavioral risk factors for stroke; however few studies examine the different types of stroke among ethnic minorities and almost none focus on South Asians. According to the US Census, the South Asian population in the United States increased by 43.3% between 2000 and 2010, a proportion more than four times the 9.7% increase for the general population [3–4]. In New Jersey alone, the number of people who identified themselves as South Asian increased by 51% (480,276 in 2000 to 725,726 in 2010) [3,5]. Thus, New Jersey provides an opportunity to address this gap in the stroke disparities literature.

Although White and colleagues investigated the incidence of ischemic stroke subtypes among racial/ethnic groups [6], most other studies of racial/ethnic differences in stroke compare the

prevalence of risk factors alone [7–10]. As a result, little is known about the differences in the pathogenesis, prognosis, and treatment of ischemic stroke subtypes for different racial/ethnic groups. This study compares the stroke experience of South Asians with that of other racial/ethnic groups in a highly diverse population served by a comprehensive regional stroke center.

## Methods

### Data Source

Data on all acute stroke cases were prospectively collected at the time of admission to the New Jersey Neuroscience Institute at John F. Kennedy (JFK) Medical Center in Edison, New Jersey. All variables related to stroke diagnosis, treatment, and outcomes were abstracted from the medical records of patients by trained personnel using a standardized algorithm and entered into a computerized registry system. These included the Center for Disease Control's Paul Coverdell Stroke Registry variables, and the trial of Org 10172 in Acute Stroke Treatment (TOAST)

etiologic classifications elements. Predictive factors for stroke included age, sex, race/ethnicity, obesity, diabetes mellitus, hypertension, cardiac diseases, and lipid profiles. Data on history of cigarette smoking, past stroke or Transient Ischemic Attack (TIA), prior prescription medication use, and other comorbidities were collected, along with clinical and anthropometric measures.

### Study Populations

There were 3,540 acute stroke admissions between 2006 and 2011. After excluding 250 (7.1%) patients who did not meet the racial/ethnic categorization (white, African American, South Asian or Hispanic) and those who were  $\leq 18$  years of age, 3,290 acute stroke patients were selected for this analysis. All patients who self-identified India or Pakistan as country of origin were classified as South Asian; as many South Asians self-identify as white; the surnames of the remaining patients were examined to determine race/ethnicity. International medical graduates of South Asian origins that were trained in data abstraction and surname recognition performed surname identification. They categorized patients with surnames common to Bangladesh, Bhutan, India, Nepal, Pakistan, Sri Lanka, and the Maldives as South Asians [11]. This method has been validated by the RAND cooperation and the US Census bureau, among others [12–15]. To capture individual level data for patients' education, occupation and income, socioeconomic status (SES), patient zip codes were matched to the US Census of Population (2000) [5]. Only 0.05% of patients lacked zip code information and SES could not be assigned.

### Clinical Outcomes

All patients were evaluated with standard blood tests for fasting glucose, hemoglobin A1C (HbA1c) as well as lipid and coagulation profiles. Computed tomography (CT) scans of the brain were performed at the time of initial evaluation and again in 24 hours. The majority of patients underwent magnetic resonance imaging (MRI) of the brain. Patients had extra-cranial vascular imaging using CT angiography (CTA), and MR angiography (MRA). All patients undergoing CTA or MRA also had intracranial vascular imaging and 2D trans-thoracic echocardiography, and either Holter monitor or a minimum of 24 hours of telemetric cardiac monitoring. Patients with a suspected embolic source underwent trans-esophageal imaging.

Acuity and extent of neurological deficits from stroke were determined according to the NIHSS scoring system [16–17]. TOAST classification was performed by stroke-trained neurologists using the criteria published by Adams et al. (1993) [18]. Stroke classifications include large-artery atherosclerosis (LAA), embolism of cardiac origin (CE), small-artery occlusions (SAO), other determined/known cause, and undetermined/unknown causes (including two or more of the above) [18–19]. Patients with two or more identified causes of ischemic stroke were classified as undetermined causes of ischemic stroke.

### Vascular Disease Risk Factors

Diagnosis of diabetes was established if a patient was under treatment with an anti-diabetic medication or insulin or had a fasting glucose level  $\geq 140$  mg/dL, or a history of type I or II diabetes [20]. Hypertension was established if patients were on antihypertensive therapy or if their systolic/diastolic blood pressures were  $\geq 160/90$  mm Hg upon admission [21]. Hypercholesterolemia was defined as total cholesterol (TC)  $\geq 240$  mg/dL, or under treatment with cholesterol-reducing medication [22]. Obesity was determined by body mass index (BMI). Cardiac disease was defined as a history of coronary artery disease,

myocardial infarction, congestive heart failure, angina, coronary artery bypass graft, angioplasty, atrial fibrillation and other arrhythmias, or any current use of cardiac medications. Smoking was defined if patient smoked at least one cigarette during the year.

### Statistical Analysis

Institutional Review Board approval to evaluate the data was obtained both from the JFK Medical Center and the University of Medicine and Dentistry of New Jersey. Patient informed consent to examine the medical record was not obtained since data abstractions were anonymized/de-identified and included no Patient Health Information (PHI). All variables were summarized by race/ethnicity and reported as mean  $\pm$  standard deviation (SD) or median and interquartile range as appropriate. Variables were compared among racial/ethnic groups with  $\chi^2$  or Fisher's exact tests for categorical variables and the Kruskal-Wallis tests for continuous variables, while differences in means between racial/ethnic groups were compared using analysis of variance (ANOVA). Because triglycerides, hemoglobin A1c, fasting blood glucose and BMI values were positively skewed, natural logarithmic transformation was used and results were expressed as geometric means with 95% confidence intervals (CI). Finally, the distributions of ischemic stroke subtypes were examined by race/ethnicity. All analyses were done using SAS statistical software, version 9.2 (SAS Institute Inc., Cary, NC).

### Results

The socio-demographic characteristics of study subjects are detailed in Table 1. Among the 3,290 stroke admissions, 65.5% were white, 18.4% were African American, 8.3% were South Asian and 7.8% were Hispanic. Women accounted for over half of all stroke patients in the cohort; however their proportions were lower among South Asians and Hispanics. There were significant differences in age by race/ethnicity ( $P < 0.0001$ ). The overall mean age was 70 years, with whites the oldest among the racial/ethnic groups (mean = 73 years). South Asians were much younger (mean = 65 years) with only 11% on Medicare as compared to 23% of whites. Socioeconomic status comparison by zip code revealed that South Asians tended to reside in areas with the highest median family income (\$78,389). South Asian patients were also more likely to be college graduates as compared to other racial/ethnic groups.

Table 2 and 3 detail the distribution of stroke risk factors, history of prescription medication use and clinical measurements related to stroke by race/ethnicity. Hypertension was the most frequent risk factor for stroke among all racial/ethnic groups, ranging from 82% among African Americans to 70% among Hispanics. The prevalence of hypertension was similar between the South Asian and white subjects in this study, at 75.5% and 76.7%, respectively. However, there was a significant difference between South Asians and African Americans,  $p = 0.0254$  (pairwise comparison). Comorbidities such as diabetes mellitus, cardiac disease and past history of stroke/TIA were noteworthy risk burdens for all racial/ethnic categories, Table 2. South Asians had statistically significantly higher prevalence of diabetes mellitus when compared to whites ( $p < 0.0001$ ) and Hispanics ( $p = 0.0022$ ). South Asians also reported a lower rate of antihypertensive medications use as compared to whites and African Americans but higher than Hispanics; however, only 9.2% of South Asians reported any history of smoking, a well-known stroke risk factor, Table 2.

**Table 1.** Characteristics of patients with acute stroke by race/ethnicity.

| Variable                      | South Asians<br>N = 273 | Whites<br>N = 2156 | African Americans<br>N = 605 | Hispanics<br>N = 256 | Total N = 3290    | P <sup>a</sup>       |
|-------------------------------|-------------------------|--------------------|------------------------------|----------------------|-------------------|----------------------|
| <b>Demographics</b>           |                         |                    |                              |                      |                   |                      |
| Mean age, years (SD)          | 65.1 (14.5)             | 73.0 (14.4)        | 64.7 (14.5)                  | 63.8 (16.1)          | 70.0 (15.1)       | <0.0001 <sup>b</sup> |
| % Female                      | 40.7                    | 55.0               | 59.7                         | 46.9                 | 54.0              | <0.0001              |
| <b>Insurance Status, %</b>    |                         |                    |                              |                      |                   | 0.9441 <sup>c</sup>  |
| Medicare                      | 10.6                    | 23.1               | 18.0                         | 21.5                 | 21.0              |                      |
| Medicaid                      | 2.6                     | 0.7                | 2.1                          | 1.6                  | 1.2               |                      |
| Medicare and Medicaid         | 16.5                    | 3.5                | 8.4                          | 8.6                  | 5.9               |                      |
| Commercial/VA                 | 25.3                    | 16.6               | 20.7                         | 16.4                 | 18.0              |                      |
| Self-Pay/None                 | 22.3                    | 2.8                | 12.2                         | 16.0                 | 7.2               |                      |
| HMO                           | 0.0                     | 0.1                | 0.2                          | 0.0                  | 0.1               |                      |
| Undetermined                  | 0.8                     | 0.1                | 0.0                          | 0.0                  | 0.1               |                      |
| Any Combination Above         | 21.9                    | 53.1               | 38.4                         | 35.9                 | 46.5              |                      |
| <b>Socioeconomic Status</b>   |                         |                    |                              |                      |                   |                      |
| % Unemployed                  | 5.9                     | 40.6               | 28.2                         | 25.3                 | 4.1               | <0.0001              |
| Median Household Income (IQR) | \$78,389 (17,446)       | \$62,964 (11,689)  | \$50,707 (15,374)            | \$47,708 (23,174)    | \$61,091 (18,805) | 0.1465 <sup>d</sup>  |
| Median Household Size         | 3.0                     | 3.3                | 1.8                          | 1.8                  | 2.7               |                      |
| <b>% Education Level</b>      |                         |                    |                              |                      |                   | <0.0001              |
| <High School                  | 17.2                    | 16.8               | 32.0                         | 50.3                 | 23.6              |                      |
| High School Graduate          | 14.1                    | 36.2               | 38.1                         | 30.3                 | 34.1              |                      |
| College Graduate              | 68.7                    | 47.0               | 29.9                         | 19.4                 | 42.3              |                      |
| <b>% Below Poverty Line</b>   |                         |                    |                              |                      |                   | <0.0001              |
|                               | 6.3                     | 33.0               | 28.0                         | 32.7                 | 19.5              |                      |

HMO = Health Maintenance Organization.

VA = Veterans Affairs.

NS = not significant.

SD = standard deviation.

IQR = interquartile range.

<sup>a</sup> $\chi^2$  test.<sup>b</sup>ANOVA comparing mean age by race/ethnicity.<sup>c</sup>Fisher's exact test.<sup>d</sup>Kruskal-Wallis test.

doi:10.1371/journal.pone.0108901.t001

Stroke related clinical measurements at the time of admission by race/ethnicity are detailed in Table 3. Although the overall race/ethnicity comparison of systolic blood pressure did not show any race/ethnicity effect, South Asians had a significantly higher mean diastolic blood pressure levels when compared to whites and Hispanics (pairwise comparison,  $p = 0.0006$  and  $p = 0.0232$ , respectively). Additionally, South Asians had higher triglycerides levels than African Americans ( $p < 0.0001$ ); South Asians also had significantly higher levels of HbA1c than all other race/ethnicity groups, Table 3. Although, there was no significant difference in the mean TC blood concentrations levels; South Asians had significantly lower circulating HDL levels than African Americans ( $p = 0.0019$ ; Table 3).

Table 4 compares clinical characteristics, vital signs and lipid profiles of acute stroke patients' by race/ethnicity using categories accepted in the clinical practice, diagnosis and management guidelines for hypertension, diabetes and hypercholesterolemia [21–22]. Higher proportion of South Asians had Blood pressure levels  $> 160/100$  mmHg when compared to all other racial/ethnic groups, Table 4 (overall race/ethnicity effect  $p$ -value = 0.002). About 40% of South Asian patients had fasting blood glucose levels  $\geq 126$  mm/dL, while only 33% of whites and 37.5% of African Americans fall in this category (overall race/ethnicity

effect  $p = 0.028$ ), however pairwise comparison showed no statistical significant differences. The distribution of low-density lipoproteins that were considered to be high or very high (where  $LDL \geq 160$  mg/dL) was lower among South Asians than among African Americans and Hispanics (10.6 and 8.9%, respectively). Moreover, larger proportion of South Asians had lower levels of high-density lipoproteins (where  $HDL \leq 40$  mg/dL) than all other racial/ethnic groups (overall race/ethnicity effect  $p < 0.0001$ ), a potent indicator of the risk for cardiovascular diseases.

A comparison of the overall race/ethnicity effect in the incidences of stroke types and ischemic stroke subtypes showed a significant variation,  $p = 0.0040$ ; however, pairwise comparison of South Asians to the other racial/ethnic groups did not show any statistical effect, Table 5. Ischemic stroke was the most frequent reason for acute stroke admission among this cohort. South Asians had the highest proportion of patients with ischemic stroke (~50%) when compared to other racial/ethnic groups. The examination of the TOAST etiologic classifications among the 1541 ischemic stroke cases showed that there was an overall race/ethnicity effect in variation of ischemic stroke subtypes (overall race/ethnicity effect  $p = 0.0013$ , Table 5). Specifically, South Asian patients had the highest proportion of admissions with SAO diagnosis (29.4%) as compared to other racial/ethnic groups.

**Table 2.** Prevalence of risk factors and history of medication use among stroke patients by race/ethnicity.

| Variable                         | South Asian<br>N = 273 | White N = 2156 | African American<br>N = 605 | Hispanic N = 256 | P <sup>a</sup> |
|----------------------------------|------------------------|----------------|-----------------------------|------------------|----------------|
| <b>Risk Factor %</b>             |                        |                |                             |                  |                |
| Hypertension                     | 75.5                   | 76.7           | 82.0                        | 70.0             | 0.0010         |
| <i>p</i> <sup>c</sup>            | -                      | 0.656          | 0.0254                      | 0.1528           |                |
| Diabetes mellitus                | 45.4                   | 30.7           | 42.2                        | 32.4             | <0.0001        |
| <i>p</i> <sup>c</sup>            | -                      | <0.0001        | 0.3648                      | 0.0022           |                |
| Cardiac diseases <sup>b</sup>    | 24.5                   | 36.0           | 27.9                        | 22.3             | <0.0001        |
| <i>p</i> <sup>c</sup>            | -                      | 0.0002         | 0.2940                      | 0.5368           |                |
| Dyslipidemia                     | 33.5                   | 35.5           | 30.7                        | 32.0             | 0.9994         |
| <i>p</i> <sup>c</sup>            | -                      | 0.9994         | 0.1600                      | 0.3952           |                |
| Smoker                           | 9.2                    | 17.2           | 15.4                        | 8.2              | <0.0001        |
| <i>p</i> <sup>c</sup>            | -                      | 0.0007         | 0.0125                      | 0.6970           |                |
| Prior stroke or TIA              | 31.1                   | 33.3           | 39.8                        | 28.5             | 0.0028         |
| <i>p</i> <sup>c</sup>            | -                      | 0.4734         | 0.0135                      | 0.5106           |                |
| Any Combination                  | 49.1                   | 48.8           | 47.3                        | 45.3             | 0.4734         |
| <i>p</i> <sup>c</sup>            | -                      | 0.9280         | 0.6189                      | 0.3852           |                |
| <b>Prescription Medication %</b> |                        |                |                             |                  |                |
| Antihypertensive                 | 68.5                   | 73.2           | 72.7                        | 61.3             | 0.0005         |
| <i>p</i> <sup>c</sup>            | -                      | 0.1012         | 0.1992                      | 0.0840           |                |
| Cholesterol                      | 37.4                   | 44.9           | 37.2                        | 38.3             | 0.0007         |
| <i>p</i> <sup>c</sup>            | -                      | 0.0175         | 0.9610                      | 0.8276           |                |
| Antiplatelet                     | 45.1                   | 44.1           | 37.5                        | 35.9             | 0.0037         |
| <i>p</i> <sup>c</sup>            | -                      | 0.7559         | 0.0348                      | 0.0329           |                |
| Anticoagulant                    | 27.1                   | 36.9           | 33.1                        | 28.1             | 0.0007         |
| <i>p</i> <sup>c</sup>            | -                      | 0.0015         | 0.0781                      | 0.7934           |                |
| Diabetic                         | 41.4                   | 25.1           | 35.2                        | 27.3             | <0.0001        |
| <i>p</i> <sup>c</sup>            | -                      | <0.0001        | 0.0791                      | 0.0007           |                |

NS = Not Significant.

TIA = Transient Ischemic Attack.

LDL = Low Density Lipoprotein.

HDL = High Density Lipoprotein.

<sup>a</sup>P-value from a  $\chi^2$  test for the overall race/ethnicity effect.

<sup>b</sup>Includes atrial fibrillation, prosthetic heart valve, coronary artery disease/prior myocardial infarction, carotid stenosis, peripheral vascular disease and heart failure.

<sup>c</sup>P-values from chi-square tests for overall race/ethnicity effect followed by pairwise comparison between race/ethnicities. A significant level of 0.05 was used for the overall race/ethnicity comparisons. Bonferroni adjustments created a significance level of  $0.05/2 = 0.025$  (since South Asians were to each race/ethnicity at a time).

doi:10.1371/journal.pone.0108901.t002

South Asians also had a statistically significantly higher proportion of patients with LAA subtype diagnosis than whites (pairwise comparison *p*-value = 0.0123, Table 5). Overall LAA diagnosis was more common among Hispanics 30.5%, followed by South Asians at 26.5%. Only 8.1% South Asians had ischemic stroke subtype diagnosis of cardio embolic etiology as compared to 19.7% of white patients, Table 5.

## Discussion

Stroke remains a major health issue, particularly among minority and ethnic sub-groups. For example, despite being almost a decade younger than white patients, having more college graduates, and residing in neighborhoods with the highest median income compared to other study subjects, South Asians had clinical risk factors for stroke comparable to those of African Americans and often worse than those for Hispanics. It is well established that hypertension is potent risk factor for stroke. This analysis showed it to be the most prevalent risk factor for all stroke

victims, distantly trailed by diabetes mellitus and cardiac diseases. South Asian and white patients in our cohort had higher proportions of subjects with hypertension than Hispanics. Prevalence of smoking among South Asians in this study (which included Asian Indians) was consistent with a 2012 report by the Center for Disease Control and Prevention (CDC) [23] that indicated that only about 12% of Asian Indian survey respondents reported smoking within the past 30 days. As is the case for many US immigrants, South Asians may have lower use or access to primary care services or, even if they are not normally hypertensive, suffer a higher prevalence of blood pressure in the acute phase of stroke. Among our cohort, race/ethnicity accounted for significant variability in HbA1c, fasting blood glucose and blood pressure measurements at the time of admission. South Asians had the highest proportion of patients with these risk factors, while TC and LDL levels were highest among African American and Hispanic patients. One explanation

**Table 3.** Clinical measurements at the time of admission among stroke patients by race/ethnicity.

| Variable                                                       | South Asian<br>N = 273 | White N = 2156 | African American<br>N = 605 | Hispanic N = 256 | P <sup>a</sup> |
|----------------------------------------------------------------|------------------------|----------------|-----------------------------|------------------|----------------|
| <b>Mean clinical measurements (SD) or (95% CI)<sup>b</sup></b> |                        |                |                             |                  |                |
| Blood pressure (mmHg)                                          |                        |                |                             |                  |                |
| Systolic                                                       | 156.8 (32.6)           | 152.7(30.5)    | 153.8 (33.0)                | 151.7 (28.2)     | <0.1929        |
| <i>p</i> <sup>c</sup>                                          | -                      | 0.1004         | 0.1506                      | 0.3719           |                |
| Diastolic                                                      | 87.4 (21.1)            | 82.7 (18.7)    | 86.2 (20.1)                 | 83.0 (17.2)      | <0.0001        |
| <i>p</i> <sup>c</sup>                                          | -                      | 0.0006         | 0.6604                      | 0.0232           |                |
| Total cholesterol (mg/dl)                                      | 172.3 (44.9)           | 171.6 (44.5)   | 177.5 (47.3)                | 177.2 (50.1)     | 0.0397         |
| <i>p</i> <sup>c</sup>                                          | -                      | 0.9891         | 0.2994                      | 0.4883           |                |
| LDL (mg/dl)                                                    | 105.6 (38.2)           | 104.2 (38.5)   | 110.2 (38.8)                | 111.2 (40.4)     | 0.0032         |
| <i>p</i> <sup>c</sup>                                          | -                      | <0.0001        | 0.2663                      | 0.2575           |                |
| HDL (mg/dl)                                                    | 41.5 (11.9)            | 43.4 (13.7)    | 45.1 (15.2)                 | 41.0 (11.3)      | 0.0003         |
| <i>p</i> <sup>c</sup>                                          | -                      | 0.0818         | 0.0019                      | 0.9543           |                |
| Triglycerides (mg/dl)                                          | 115.8                  | 107.4          | 92.1                        | 112.4            | <0.0001        |
|                                                                | (108.3–115.8)          | (105.1–109.9)  | (88.0–96.5)                 | (108.3–123.7)    |                |
| <i>p</i> <sup>c</sup>                                          | -                      | 0.0753         | <0.0001                     | 0.8383           |                |
| HbA1c (%)                                                      | 6.9                    | 6.3            | 6.7                         | 6.5              | 0.0143         |
|                                                                | (6.7–7.1)              | (6.2–6.3)      | (6.5–6.8)                   | (6.3–6.7)        |                |
| <i>p</i> <sup>c</sup>                                          | -                      | <0.0001        | 0.0454                      | 0.0083           |                |
| Fasting blood glucose (mg/dl)                                  | 132.8                  | 122.4          | 128.8                       | 130.2            | <0.0001        |
|                                                                | (126.4–139.6)          | (120.7–124.2)  | (124.6–133.3)               | (123.7–137.2)    |                |
| <i>p</i> <sup>c</sup>                                          | -                      | 0.0016         | 0.4810                      | 0.8358           |                |
| Body mass index (kg/m <sup>2</sup> )                           | 25.3                   | 26.9           | 28.3                        | 27.8             | <0.0001        |
|                                                                | (24.8–25.9)            | (26.6–27.2)    | (27.7–28.8)                 | (27.1–28.5)      |                |
| <i>p</i> <sup>c</sup>                                          | -                      | 0.0001         | <0.0001                     | <0.0001          |                |

<sup>a</sup>Overall p-value from a type 3 tests of fixed effects.

<sup>b</sup>95%CI: 95% Confidence Interval.

<sup>c</sup>P-values for the overall race/ethnicity effect followed by pairwise comparison between race/ethnicities. Dunnett adjustment was applied to correct for pairwise comparisons. Results were considered statistically significant when *p* values were less than 0.05.

doi:10.1371/journal.pone.0108901.t003

for these findings is that South Asians may be more prone to stress-induced hyperglycemia.

Great care should be taken in interpreting the findings of this study, especially because the diagnosis of hypertension and diagnosis for diabetes based on FBG levels  $\geq 140$  mg/dL are often questionable if not performed during a medically quiescent period. However, the prognosis of developing diabetes on HbA1c and FBG levels is generally considered reliable.

White and colleagues reported that blacks are at a higher risk for intracerebral atherosclerosis compared with whites [6]. We found that South Asian and Hispanics patients were equally likely to be diagnosed with the stroke sequelae of this disease as whites or African Americans. Furthermore, we found a high proportion of ischemic stroke distributed to “other undetermined causes” a classification including “two or more causes” of stroke etiologies, a situation common among patients with small vessel disease. It is possible that the high prevalence of ischemic stroke of undetermined causes among the African American patients in our cohort is correlated with a higher incidence of cardiovascular risk factors in the general African American population.

Risk factors for ischemic stroke varied significantly by race/ethnicity among our cohort. There was  $>25\%$  increased risk for developing SAO among South Asian patients than whites. This can be explained by the substantial age difference between these

two groups in that South Asians tended to be a decade or so younger than whites and more likely to suffer from SAO at earlier ages. This competing morbidity perhaps reduced their risk of LAA at older ages. Indeed, SAO was more common among South Asians than any other racial/ethnic group. However, the conclusion regarding these factors among South Asians may not hold true when examining South Asians living in their home countries.

The strength of our study stems from the fact that the data were collected on subjects that were assessed immediately following the onset of stroke symptoms by neurologists and a dedicated stroke team at a comprehensive stroke center. Data gathered in this manner have been reported to have a less than 2% error rate of stroke clinical diagnosis [23]. A possible limitation in the overall interpretations of results here is that the fairly large sample size may precipitate a statistically significant result with no clinical significance. The reader is reminded to exercise value judgment when making any inference based on the result of larger sample sized studies as this one.

## Conclusions

In order to improve stroke outcomes and to achieve the impact goals set by the American Heart Association to reduce stroke death by 20% by 2020, future epidemiologic studies that investigate and

**Table 4.** Clinical characteristics, signs and lipid profiles of stroke patients by race/ethnicity vital.

| Variable                                              | South Asian<br>N = 273 | White N = 2156 | African American<br>N = 605 | Hispanic N = 256 | P <sup>a</sup> |
|-------------------------------------------------------|------------------------|----------------|-----------------------------|------------------|----------------|
| <b>Blood Pressure (mmHg)<sup>b</sup></b>              |                        |                |                             |                  | 0.0020         |
| ≤120/80                                               | 35.1                   | 42.2           | 34.7                        | 40.2             |                |
| 120–139/80–89                                         | 23.1                   | 20.8           | 22.0                        | 24.6             |                |
| 140–159/90–99                                         | 16.1                   | 16.8           | 18.0                        | 12.9             |                |
| >160/100                                              | 19.1                   | 12.2           | 16.2                        | 13.3             |                |
| Missing                                               | 6.6                    | 7.9            | 9.1                         | 9.0              |                |
| <b>Fasting Blood Glucose (mm/dL)<sup>c</sup></b>      |                        |                |                             |                  | 0.0280         |
| <126                                                  | 51.3                   | 55.7           | 50.0                        | 48.8             |                |
| ≥126                                                  | 40.0                   | 33.0           | 37.5                        | 39.8             |                |
| Missing                                               | 8.8                    | 11.4           | 12.6                        | 11.3             |                |
| <b>HbA1c Classifications<sup>c</sup></b>              |                        |                |                             |                  | <0.0001        |
| <6.5%                                                 | 34.8                   | 44.4           | 38.0                        | 40.6             |                |
| ≥6.5%                                                 | 37.0                   | 17.7           | 29.0                        | 24.6             |                |
| Missing                                               | 28.2                   | 37.8           | 33.1                        | 34.8             |                |
| <b>Body Mass Index (kg/m<sup>2</sup>)<sup>d</sup></b> |                        |                |                             |                  | <0.0001        |
| ≤18.5                                                 | 2.9                    | 2.2            | 2.2                         | 1.2              |                |
| 18.6–24.9                                             | 44.0                   | 32.4           | 24.1                        | 24.2             |                |
| 25.0–29.9                                             | 27.5                   | 31.2           | 30.4                        | 38.0             |                |
| ≥30.0                                                 | 17.0                   | 23.1           | 30.6                        | 26.6             |                |
| Missing                                               | 8.8                    | 11.1           | 12.7                        | 10.2             |                |
| <b>Total Cholesterol (mg/dL)</b>                      |                        |                |                             |                  | 0.0171         |
| <200                                                  | 68.5                   | 64.1           | 61.0                        | 57.4             |                |
| 200–239                                               | 12.1                   | 12.9           | 17.2                        | 15.2             |                |
| >240                                                  | 7.0                    | 6.0            | 7.6                         | 8.2              |                |
| Missing                                               | 12.5                   | 17.1           | 14.2                        | 19.1             |                |
| <b>Low Density Lipoprotein (mg/dL)</b>                |                        |                |                             |                  | 0.0202         |
| <129                                                  | 66.7                   | 65.4           | 62.6                        | 59.0             |                |
| 130–159                                               | 13.9                   | 11.0           | 13.4                        | 13.7             |                |
| 160–189                                               | 4.8                    | 5.0            | 8.4                         | 6.6              |                |
| ≥190                                                  | 2.9                    | 2.2            | 2.2                         | 2.3              |                |
| Missing                                               | 11.7                   | 16.4           | 13.4                        | 18.4             |                |
| <b>High Density Lipoprotein (mg/dL)</b>               |                        |                |                             |                  | 0.0001         |
| <40                                                   | 44.7                   | 36.1           | 32.1                        | 39.8             |                |
| 40–59.9                                               | 37.0                   | 36.9           | 41.7                        | 35.9             |                |
| ≥60                                                   | 5.2                    | 9.8            | 12.2                        | 5.1              |                |
| Missing                                               | 13.1                   | 17.2           | 14.1                        | 12.5             |                |
| <b>Triglycerides (mg/dL)</b>                          |                        |                |                             |                  | <0.0001        |
| <150                                                  | 59.3                   | 63.4           | 72.7                        | 63.6             |                |
| 150–199                                               | 16.5                   | 12.3           | 8.9                         | 9.0              |                |
| 200–499                                               | 11.4                   | 6.8            | 4.5                         | 10.6             |                |
| ≥500                                                  | 0.7                    | 0.3            | 0.2                         | 0.8              |                |
| Missing                                               | 12.1                   | 17.2           | 13.7                        | 12.1             |                |

<sup>a</sup>Kruskal-Wallis test.

<sup>b</sup>Based on the 7th report of the Joint National Committee on Hypertension (JNC7).

<sup>c</sup>Criteria for diagnosis of diabetes by the American Diabetes Association, 2010.

<sup>d</sup>Centers for Disease Control BMI guidelines for weight status.

doi:10.1371/journal.pone.0108901.t004

identify the most efficient and effective clinical approaches to both prevention and treatment are important. The higher prevalence of known stroke risk factors among South Asian immigrants in this

cohort may have been attributable for the larger proportion of ischemic stroke incidence among South Asians as compared to whites, including the increased incidence of small vessel disease<sup>37</sup>.

**Table 5.** Incidence of stroke types<sup>a</sup> and ischemic stroke sub-types by race/ethnicity.

| Variable                     | South Asian<br>N = 273 | White<br>N = 2156 | African American<br>N = 605 | Hispanic<br>N = 256 | Total N = 3290 | p <sup>b</sup>                                                                                                          |
|------------------------------|------------------------|-------------------|-----------------------------|---------------------|----------------|-------------------------------------------------------------------------------------------------------------------------|
| <b>Clinical Diagnosis, %</b> |                        |                   |                             |                     |                |                                                                                                                         |
| Ischemic Stroke              | 49.8                   | 47.0              | 47.4                        | 41.0                | 46.8           | 0.0040 (South Asians vs. Whites p = 0.1843; South Asians vs. AAs p = 0.0866; and South Asians vs. Hispanics p = 0.1502) |
| Transient Ischemic Attack    | 30.4                   | 36.3              | 37.4                        | 34.3                | 35.8           |                                                                                                                         |
| Hemorrhagic Stroke           | 17.6                   | 14.9              | 13.9                        | 21.5                | 15.5           |                                                                                                                         |
| Subarachnoid                 | 4.4                    | 3.3               | 4.1                         | 8.2                 | 3.9            |                                                                                                                         |
| Intracerebral                | 13.2                   | 11.6              | 9.8                         | 13.3                | 1.6            |                                                                                                                         |
| Unspecified                  | 0.7                    | 0.7               | 1.0                         | 0.4                 | 0.7            |                                                                                                                         |
| No Stroke Diagnosis          | 1.5                    | 0.6               | 0.2                         | 1.6                 | 0.6            |                                                                                                                         |
| <b>Stroke etiology, %</b>    |                        |                   |                             |                     |                |                                                                                                                         |
|                              | n = 136                | n = 1013          | n = 287                     | n = 105             | n = 1541       |                                                                                                                         |
| Large-artery atherosclerosis | 26.5                   | 23.1              | 20.2                        | 30.5                | 23.4           | 0.0013 (South Asians vs. Whites p = 0.0123; South Asians vs. AAs p = 0.0920; and South Asians vs. Hispanics p = 0.1164) |
| Small-artery occlusions      | 29.4                   | 22.0              | 23.0                        | 23.8                | 23.0           |                                                                                                                         |
| Cardioembolism               | 8.1                    | 19.7              | 11.9                        | 15.2                | 16.9           |                                                                                                                         |
| Other                        | 35.3                   | 34.2              | 43.2                        | 27.7                | 35.5           |                                                                                                                         |
| Determined                   | 0.7                    | 2.7               | 4.5                         | 2.9                 | 2.9            |                                                                                                                         |
| Undetermined                 | 34.6                   | 31.5              | 38.7                        | 24.8                | 32.6           |                                                                                                                         |

<sup>a</sup>On average less than 3% of data was missing. Missing data was largely among Hispanics and ranged from 1.2 to 2.9%.

<sup>b</sup>P-values from chi-square tests for overall race/ethnicity effect followed by pairwise comparison between race/ethnicities. A significant level of 0.05 was used for the overall race/ethnicity comparisons. Bonferroni adjustments created a significance level of 0.05/2 = 0.025 (since South Asians were to each race/ethnicity at a time).

<sup>c</sup>Ischemic stroke classification scheme from the Trial of ORG 10172 in Acute Stroke Treatment (TOAST).

doi:10.1371/journal.pone.0108901.t005

These findings support the need for genetic and metabolomics studies that may lead to an understanding of the mechanisms of at least one stroke subtype. The further examination of the interaction between race/ethnicity and stroke risk factors can provide data that will enable clinicians to predict subtypes of stroke following an acute stroke admission and to act on that knowledge accordingly.

## Acknowledgments

We would like to extend our gratitude to all the clinicians, nurses and hospital staff at the New Jersey Neuroscience Institute at the John F. Kennedy Medical Center for their support on this work. Special thanks to

Jay Shah and Madu Gupta for their assistance in data entry and quality assurance.

## Author Contributions

Conceived and designed the experiments: TG KD MG. Performed the experiments: TG MG. Analyzed the data: TG KD YL DS MG. Contributed reagents/materials/analysis tools: TG KD YL DS MG. Wrote the paper: TG KD YL DS MG. Data abstraction: TG MG. Interpreted the data: TG KD YL DS MG. Revised the manuscript: TG KD YL DS MG.

## References

- Fang J, Alderman MH, Tu JV (2001) Trend of Stroke Hospitalization, United States, 1988–1997 Editorial Comment. *Stroke*:32(10):2221–2226.
- Pathak EB, Sloan MA (2009) Recent Racial/Ethnic Disparities in Stroke Hospitalizations and Outcomes for Young Adults in Florida, 2001–2006. *Neuroepidemiology*: 32(4):302–311.
- U.S. Census Bureau AFF. The Asian Population in the United States. Census 2010 Census Results; Available: <http://factfinder2.census.gov/faces/nav/jsf/pages/index.xhtml>. Accessed 2010 Dec 20.
- U.S. Census Bureau AFF. Race Data. Census 2010 Census Results; Available: <http://2010.census.gov/2010census/data/>. Accessed 2011 Oct 13.
- United States Department of Health and Human Services (US DHHS), Centers for Disease Control and Prevention (CDC), Bridged-race Intercensal Population Estimates and 2000–2008 (Vintage 2008) On-line Database. Available: <http://wonder.cdc.gov/bridged-race-v2008.html> Accessed 2010 Jun 9.
- White H, Boden-Albala B, Wang C, Elkind MSV, Rundek T, et al. (2005) Ischemic Stroke Subtype Incidence Among Whites, Blacks, and Hispanics: The Northern Manhattan Study. *Circulation*:111(10):1327–1331.
- Boden-Albala B, Sacco RL, Lee H-S, Grahame-Clarke C, Rundek T, et al. (2008) Metabolic Syndrome and Ischemic Stroke Risk: Northern Manhattan Study. *Stroke*:39(1):30–35.
- Liao Y, Greenlund KJ, Croft JB, Keenan NL, Giles WH (2009) Factors Explaining Excess Stroke Prevalence in the US Stroke Belt. *Stroke*:40(10):3336–3341.
- Sacco RL, Benjamin EJ, Broderick JP, Dyken M, Easton JD, et al. (1997) Risk Factors. *Stroke*:28(7):1507–1517.
- Sacco RL, Roberts JK, Boden-Albala B, Gu Q, Lin IF, et al. (1997) Race-Ethnicity and Determinants of Carotid Atherosclerosis in a Multiethnic Population: The Northern Manhattan Stroke Study. *Stroke*:28(5):929–935.
- Forbes J, Fisher M. The Cancer Institute of New Jersey and South Asian Total Health Initiative Join Forces. Available: [http://rwjms.umdnj.edu/news\\_publications/news\\_release/2010\\_release/CINJ\\_SATHI\\_screenings.html](http://rwjms.umdnj.edu/news_publications/news_release/2010_release/CINJ_SATHI_screenings.html) Accessed 2010 Dec 20.

12. Wong EC, Palaniappan LP, Lauderdale DS (2010) Using Name Lists to Infer Asian Racial/Ethnic Subgroups in the Healthcare Setting. *Medical Care*:48(6):540–546.
13. McAlpine DD, Beebe TJ, Davern M, Call KT (2007) Agreement between Self-reported and Administrative Race and Ethnicity Data among Medicaid Enrollees in Minnesota. *Health Serv Res*:42(6 Pt 2):2373–2388.
14. Elliott MN, Fremont A, Morrison PA, Pantoja P, Lurie N, et al. (2008) A New Method for Estimating Race/Ethnicity and Associated Disparities Where Administrative Records Lack Self-Reported Race/Ethnicity. *Health Serv Res*:43(5 Pt 1):1722–36.
15. Lauderdale DS, Kestenbaum B (2000) Asian American Ethnic Identification by Surname. *Popul Res Policy Rev*: 19:283–300.
16. Goldstein LB, Samsa GP (1997) Reliability of the National Institutes of Health Stroke Scale: Extension to Non-Neurologists in the Context of a Clinical Trial. *Stroke*:28(2):307–310.
17. Muir KW, Weir CJ, Murray GD, Povey C, Lees KR (1996) Comparison of Neurological Scales and Scoring Systems for Acute Stroke Prognosis. *Stroke*:27(10):1817–1820.
18. Adams H Jr, Bendixen B, Kappelle L, Biller J, Love BB, et al. (1993) Classification of Subtype of Acute Ischemic stroke. Definitions for Use in a Multicenter Clinical Trial. TOAST. Trial of Org 10172 in Acute Stroke Treatment. *Stroke*:24(1):35–41.
19. Kolominsky-Rabas PL, Weber M, Gefeller O, Neundoerfer B, Heuschmann PU (2001) Epidemiology of Ischemic Stroke Subtypes According to TOAST Criteria: Incidence, Recurrence, and Long-Term Survival in Ischemic Stroke Subtypes: A Population-Based Study. *Stroke*:32(12):2735–2740.
20. Association AD (2010) Diagnosis and Classification of Diabetes Mellitus. *Diabetes Care*:33(Supplement 1):S62–S69.
21. JNC-7 Guidelines (2003) The Seventh Report of the Joint National Committee on Prevention, Detection, Evaluation, and Treatment of High Blood Pressure. Hypertension.
22. Diagnosis and Classification of Diabetes Mellitus (2010) *Diabetes Care*:33 Suppl 1:S62–69.
23. Current Cigarette Smoking Among U.S. Adults Aged 18 Years and Older. Available: <http://www.cdc.gov/tobacco/campaign/tips/resources/data/cigarette-smoking-in-united-states.html#asians>
